# Supplementary material for: Direct evidence of secondary reconnection inside filamentary currents of magnetic flux ropes during magnetic reconnection
Source: PubMed Central journal article supplement (PMC7415135; doi:10.1038/s41467-020-17803-3), 2020-08-07
Supplement: 41467_2020_17803_MOESM1_ESM.pdf [file 41467_2020_17803_MOESM1_ESM.pdf]

1

Supplementary Information

2

**Direct evidence of secondary reconnection inside filamentary**

3

**currents of magnetic flux ropes during magnetic reconnection**

4

Wang et al.

| Events | Time                    | L (GSE)             | M (GSE)            | N (GSE)             | Crossing |
|--------|-------------------------|---------------------|--------------------|---------------------|----------|
| E1     | 09:01:05.0~09:01:06.0   | (0.88,-0.47,-0.01)  | (0.25,0.50,-0.83)  | (0.39,0.73,0.56)    | X-line   |
| E2     | 09:01:15.9~09:01:16.2   | (0.69,0.71,0.13)    | (-0.61,0.67,-0.43) | (-0.40,0.22,0.89)   | X-line   |
| E3     | 09:01:18.57~09:01:18.89 | (-0.92,0.05,0.39)   | (-0.18,0.82,-0.55) | (-0.35,-0.57,-0.74) | X-line   |
| E4     | 09:01:19.2~09:01:20.1   | (-0.70,0.69,0.16)   | (0.38,0.56,-0.73)  | (-0.60,-0.45,-0.66) | X-line   |
| E5     | 09:01:02.1~09:01:02.7   | (-0.29,0.74,0.61)   | (-0.34,-0.67,0.66) | (0.89,-0.02,0.45)   | exhaust  |
| E6     | 09:01:03.43~09:01:03.68 | (0.96,-0.16,0.23)   | (0.26,0.81,-0.53)  | (-0.10,0.57,0.82)   | exhaust  |
| E7     | 09:01:04.5~09:01:04.7   | (-0.87,-0.44,-0.22) | (-0.26,0.79,-0.56) | (0.42,-0.43,-0.80)  | exhaust  |
| E8     | 09:01:17.2~09:01:17.9   | (0.99,0.07,0.08)    | (-0.04,0.96,-0.28) | (-0.10,0.27,0.96)   | exhaust  |
| E9     | 09:01:21.6~09:01:22.5   | (-0.19,-0.89,0.41)  | (-0.67,0.42,0.61)  | (-0.72,-0.16,-0.68) | exhaust  |

5

6 **Supplementary Table 1. The time intervals and local current coordinate systems**  
7 **for all of the identified reconnection events.**

8

| Events | Time                    | Velocity (km/s)                             | Duration (s) | half-thickness ( $d_i$ ) |
|--------|-------------------------|---------------------------------------------|--------------|--------------------------|
| E1     | 09:01:05.0~09:01:06.0   | 130.8*(0.062,0.004,-0.998) <sub>LMN</sub>   | 1.0          | 1.4                      |
| E2     | 09:01:15.9~09:01:16.2   | 82.3*(-0.083,-0.145,-0.986) <sub>LMN</sub>  | 0.3          | 0.3                      |
| E3     | 09:01:18.57~09:01:18.89 | 106.3*(-0.286,0.013,0.958) <sub>LMN</sub>   | 0.32         | 0.4                      |
| E4     | 09:01:19.2~09:01:20.1   | 129.0*(-0.020,-0.483,-0.876) <sub>LMN</sub> | 0.9          | 1.3                      |
| E5     | 09:01:02.1~09:01:02.7   | 114.2*(0.155,-0.203,0.967) <sub>LMN</sub>   | 0.6          | 0.8                      |
| E6     | 09:01:03.43~09:01:03.68 | 124.4*(0.149,-0.307,-0.940) <sub>LMN</sub>  | 0.25         | 0.3                      |
| E7     | 09:01:04.5~09:01:04.7   | 111.7*(-0.159,-0.039,0.987) <sub>LMN</sub>  | 0.2          | 0.2                      |
| E8     | 09:01:17.2~09:01:17.9   | 139.1*(-0.125,-0.273,-0.954) <sub>LMN</sub> | 0.7          | 1.1                      |
| E9     | 09:01:21.6~09:01:22.5   | 97.1*(-0.140,0.006,-0.990) <sub>LMN</sub>   | 0.9          | 1.0                      |

9

10 **Supplementary Table 2. The velocities and durations for all of the identified**  
11 **reconnection events.**

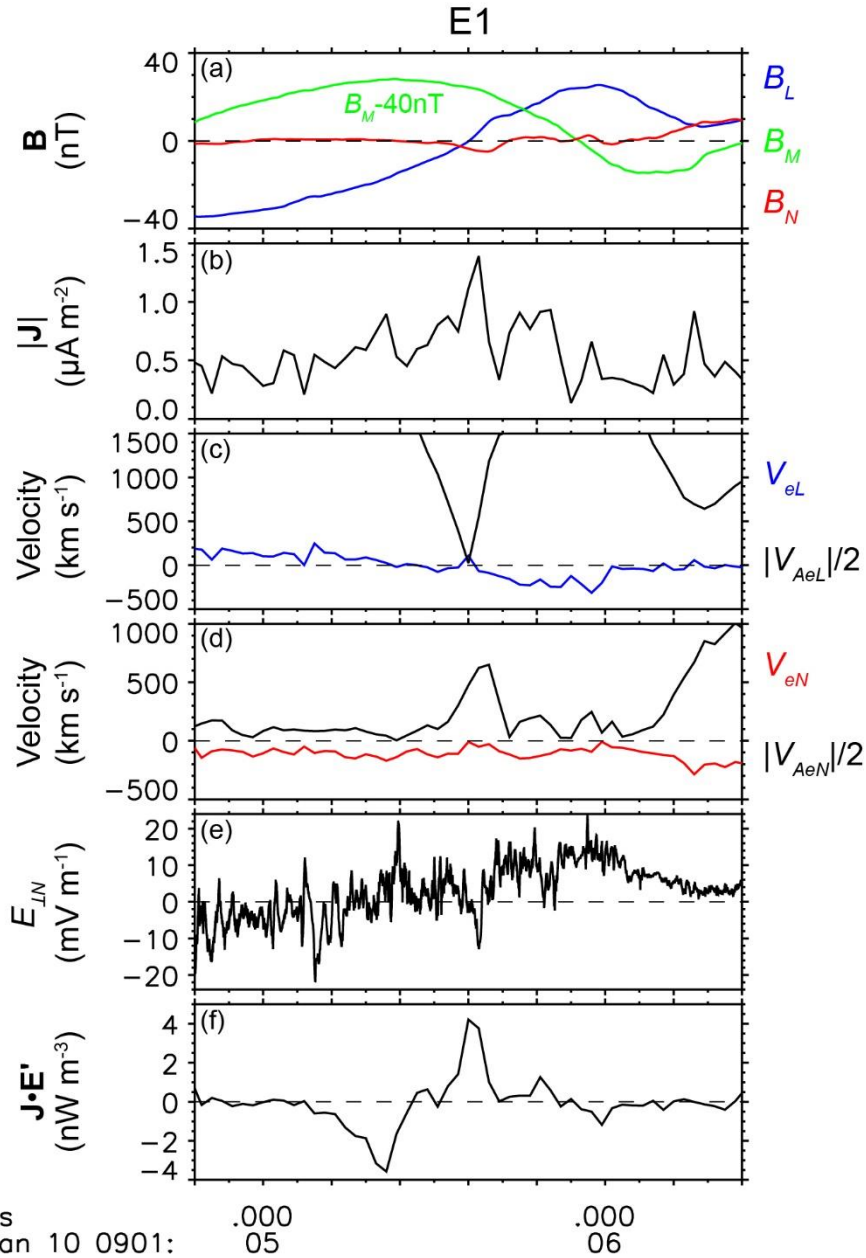

12

13 **Supplementary Figure 1 | Observations of the secondary reconnection sites E1. (a),**  
 14 magnetic field  $B_{LMN}$ . **(b),** the total current density intensity. **(c),** electron bulk velocity  
 15 and the half local electron Alfvén speed along the **L** direction. **(d),** electron bulk  
 16 velocity and the half local electron Alfvén speed along the **N** direction. **(e),**  
 17 perpendicular electric field in the **N** direction. **(f),**  $\mathbf{J} \cdot \mathbf{E}' = \mathbf{J} \cdot (\mathbf{E} + \mathbf{V}_e \times \mathbf{B})$ .

18

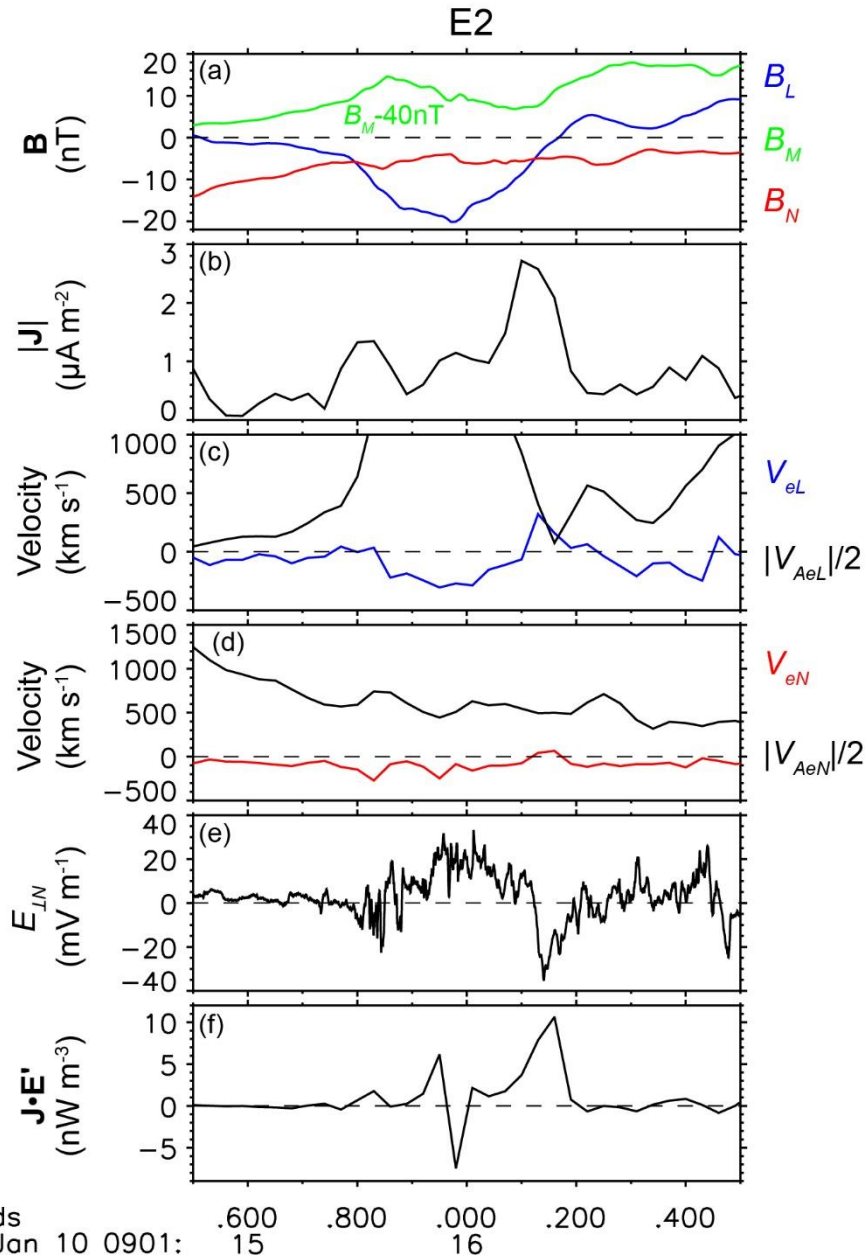

19

20 **Supplementary Figure 2 | Observations of the secondary reconnection sites E2. (a)-**

21 **(f)**, the data are shown in the same format as in Supplementary Figure 1.

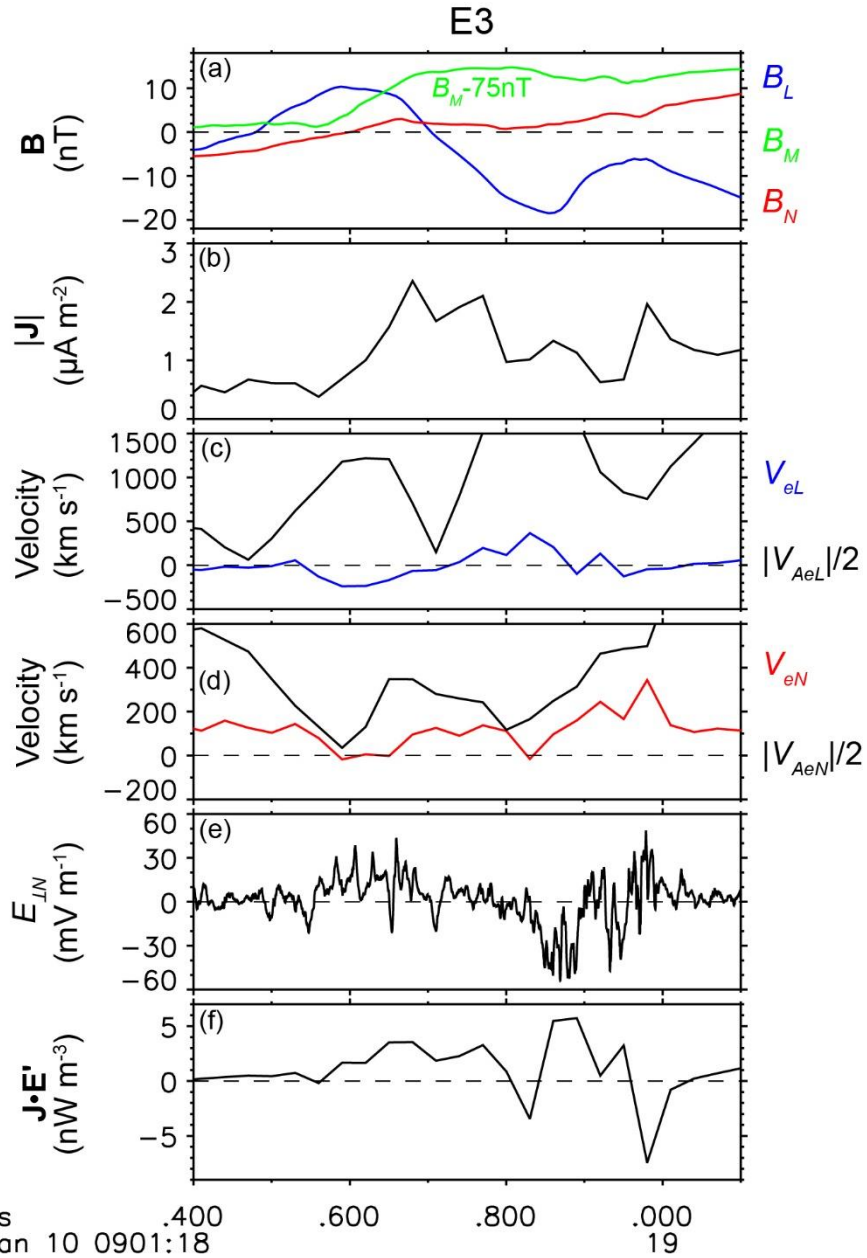

22

23 **Supplementary Figure 3| Observations of the secondary reconnection sites E3. (a)-**

24 **(f)**, the data are shown in the same format as in Supplementary Figure 1.

25

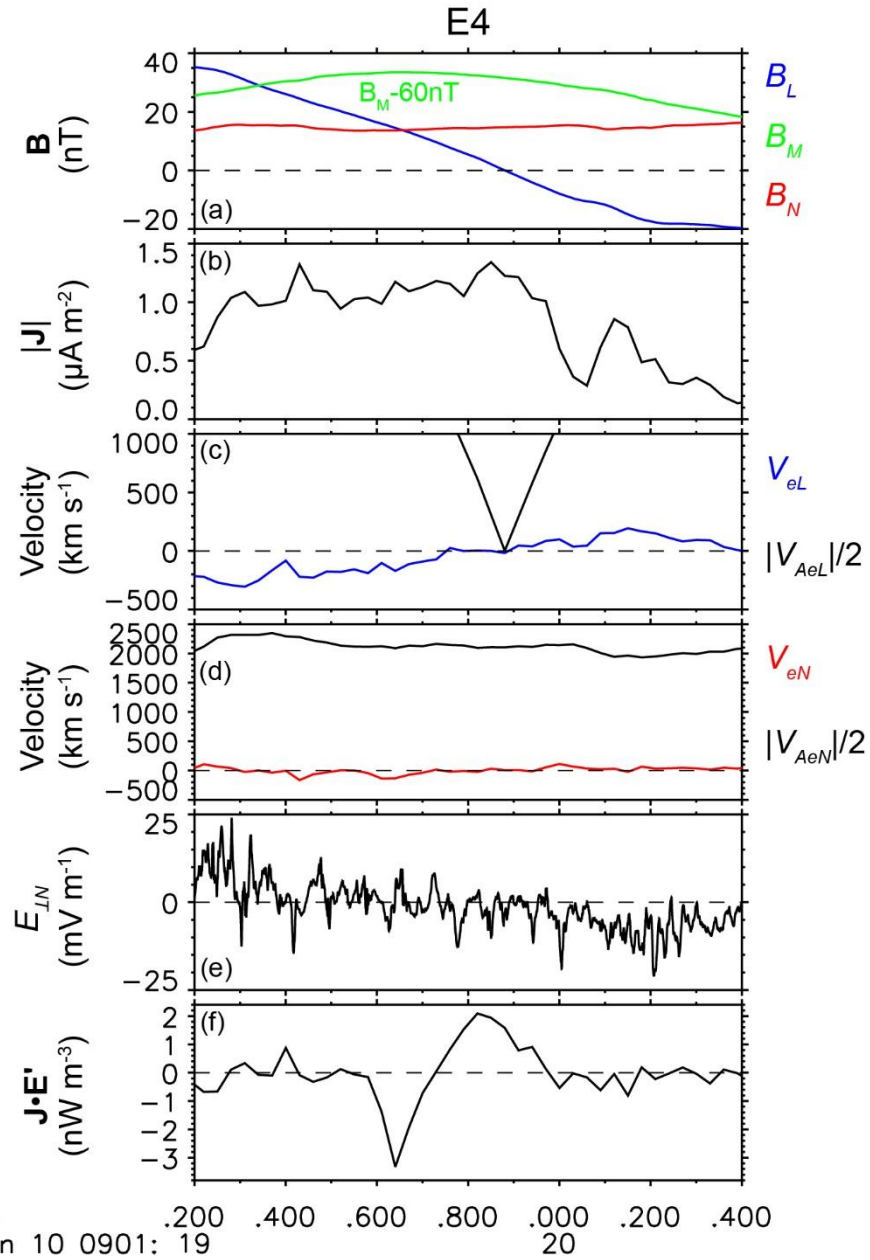

26

27 **Supplementary Figure 4| Observations of the secondary reconnection sites E4. (a)-**

28 **(f)**, the data are shown in the same format as in Supplementary Figure 1.

29



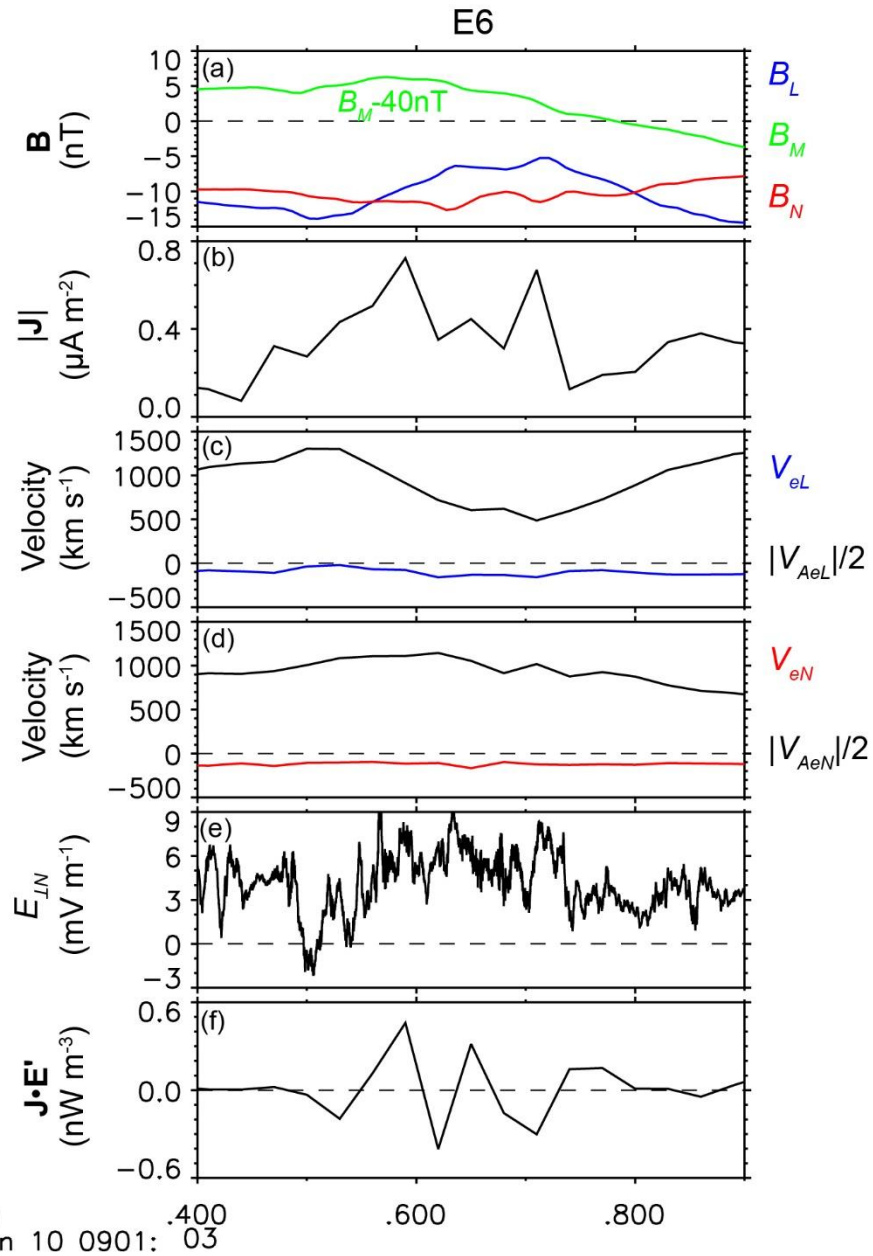

34      **Supplementary Figure 6 | Observations of the secondary reconnection exhaust E6.**

35      **(a)-(f)**, the data are shown in the same format as in Supplementary Figure 1.



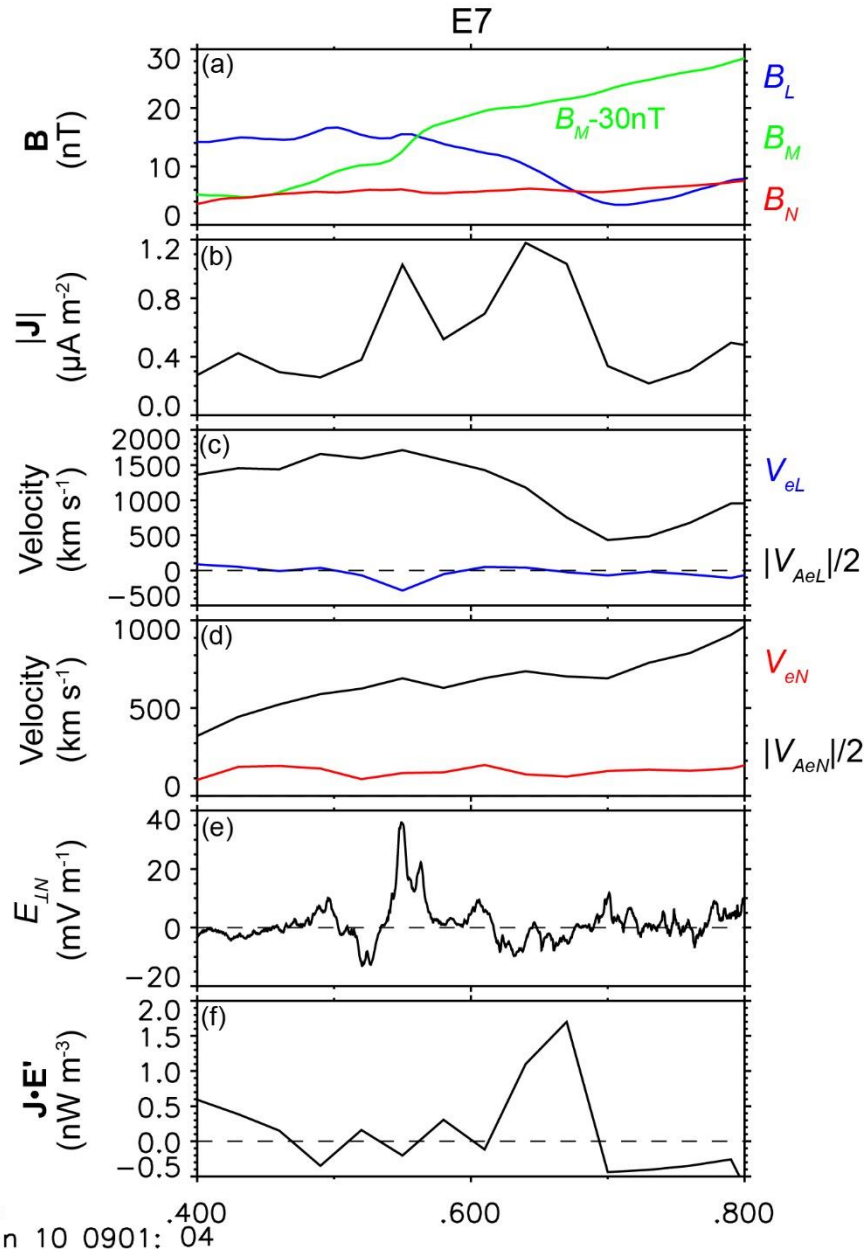

36

37 **Supplementary Figure 7 | Observations of the secondary reconnection exhaust E7.**

38 (a)-(f), the data are shown in the same format as in Supplementary Figure 1.

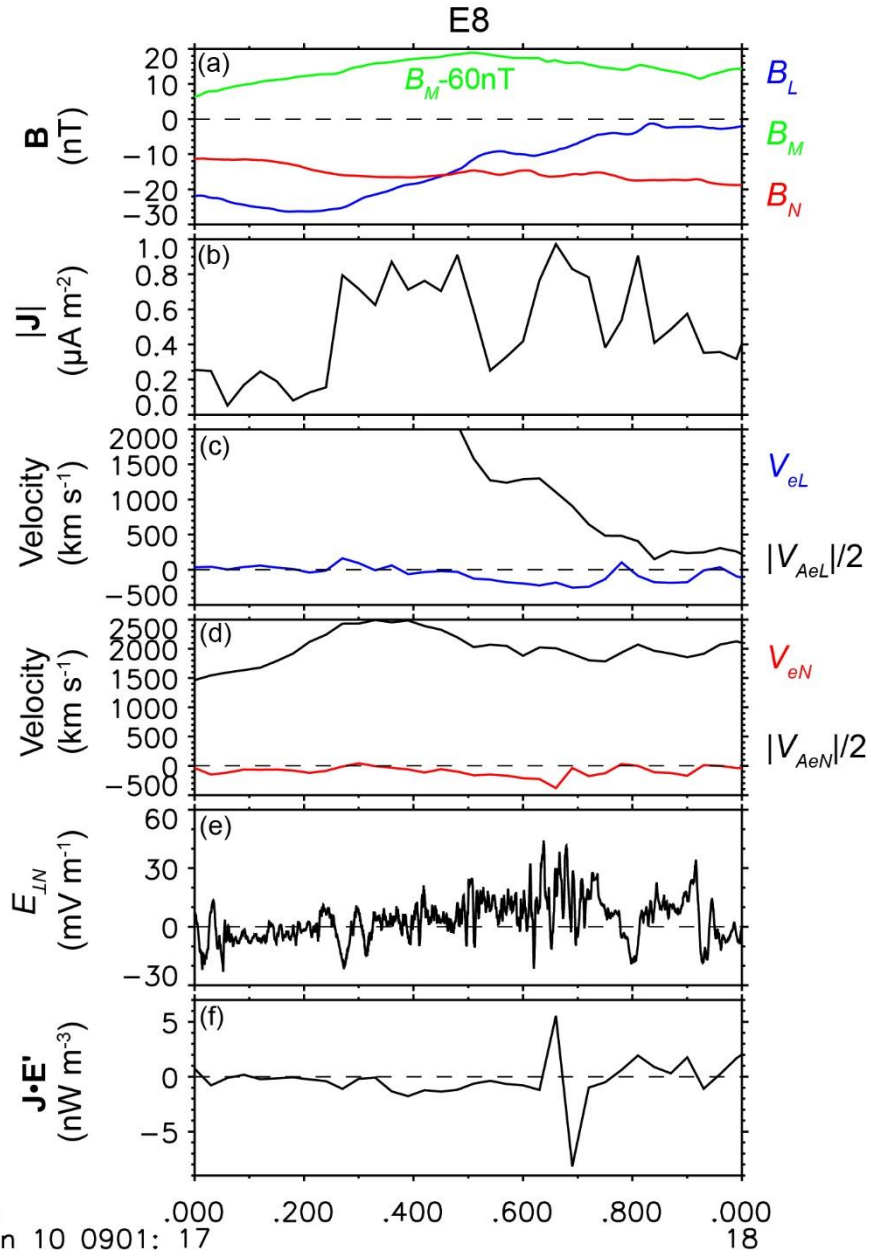

39

40 **Supplementary Figure 8 | Observations of the secondary reconnection exhaust E8.**

41 **(a)-(f)**, the data are shown in the same format as in Supplementary Figure 1.

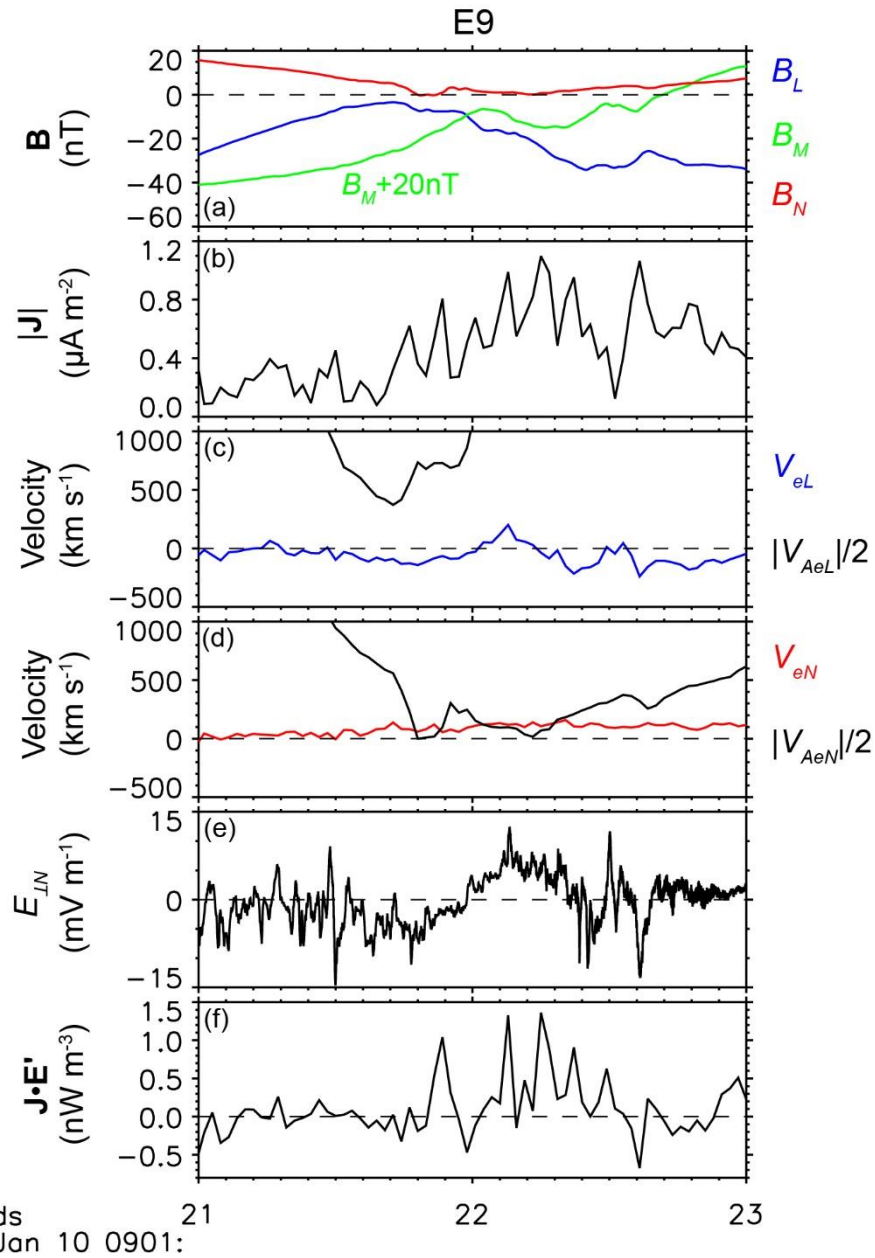

42

43 **Supplementary Figure 9 | Observations of the secondary reconnection exhaust E9.**

44 **(a)-(f)**, the data are shown in the same format as in Supplementary Figure 1.
